# Supplementary material for: Rapid evolutionary response to a transmissible cancer in Tasmanian devils
Source: PubMed Central journal article supplement (PMC5013612; doi:10.1038/ncomms12684), 2016-08-30
Supplement: ncomms12684-s1.pdf [file ncomms12684-s1.pdf]

## Supplementary Information

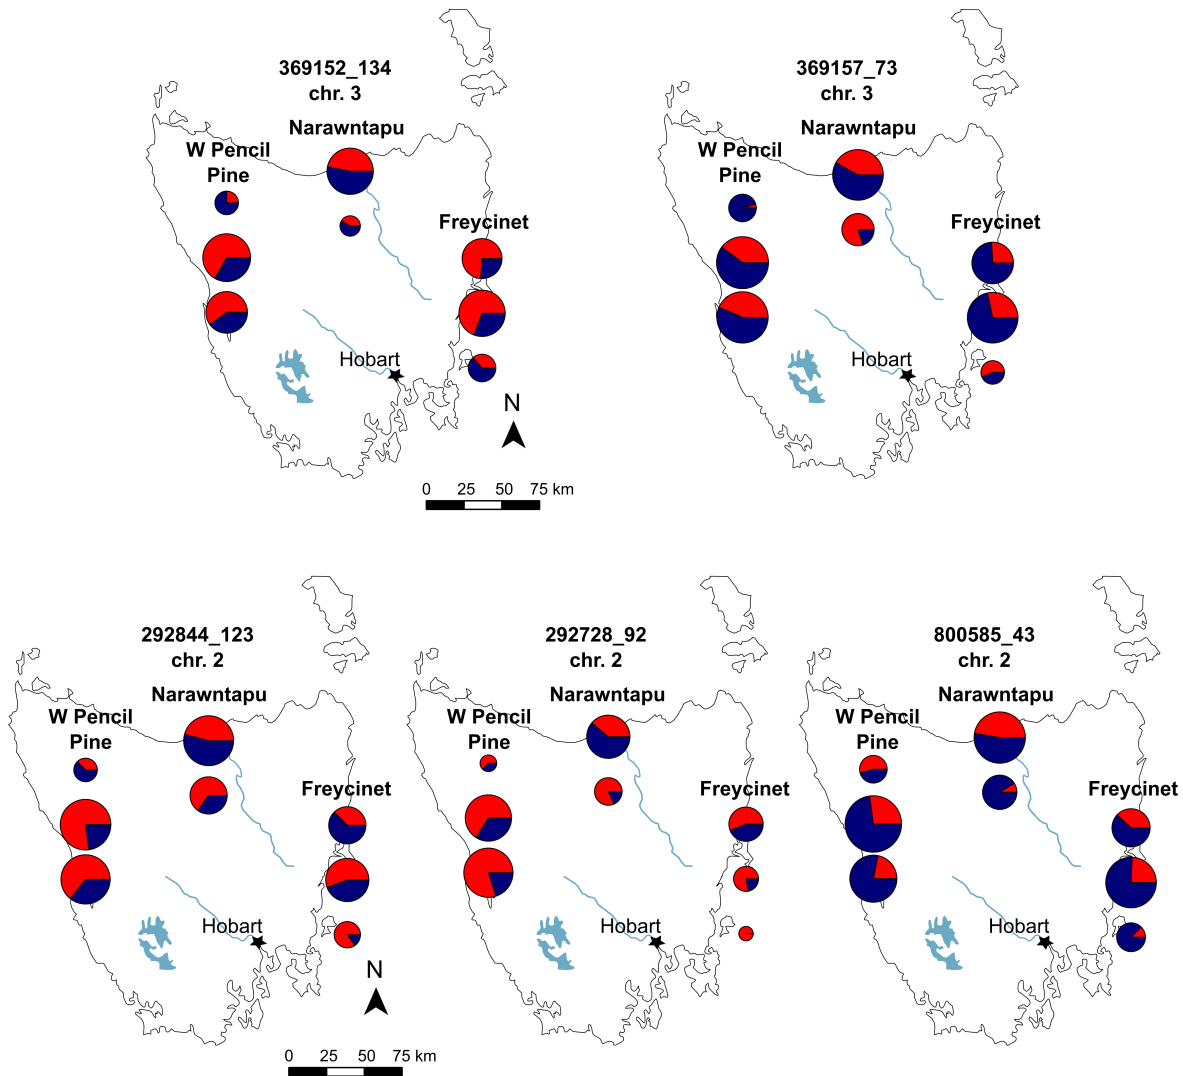

**Supplementary Figure 1. Allele frequency changes of candidate SNPs by location** Allele frequencies of the candidate region SNPs with the largest allele frequency changes in each of the three focal populations before, shortly after DFTD, and several years after DFTD. Time progresses from top to bottom within each population, and the (arbitrary) reference allele is colored red. The time points were 1999 (before), 2004 and 2008 (3 - 7 years after DFTD), and 2012 and 2013 (11 - 13 years after) for Freycinet; 1999 and 2004 (before), and 2009 (2 years after) for Narawntapu; and 2006 (before), 2009 and 2011 (3 - 5 years after), and 2013 and 2014 (7 - 8 years after) for West Pencil Pine. Sample sizes are indicated by the area of the pie . The background map is made with Natural Earth and is in the public domain.

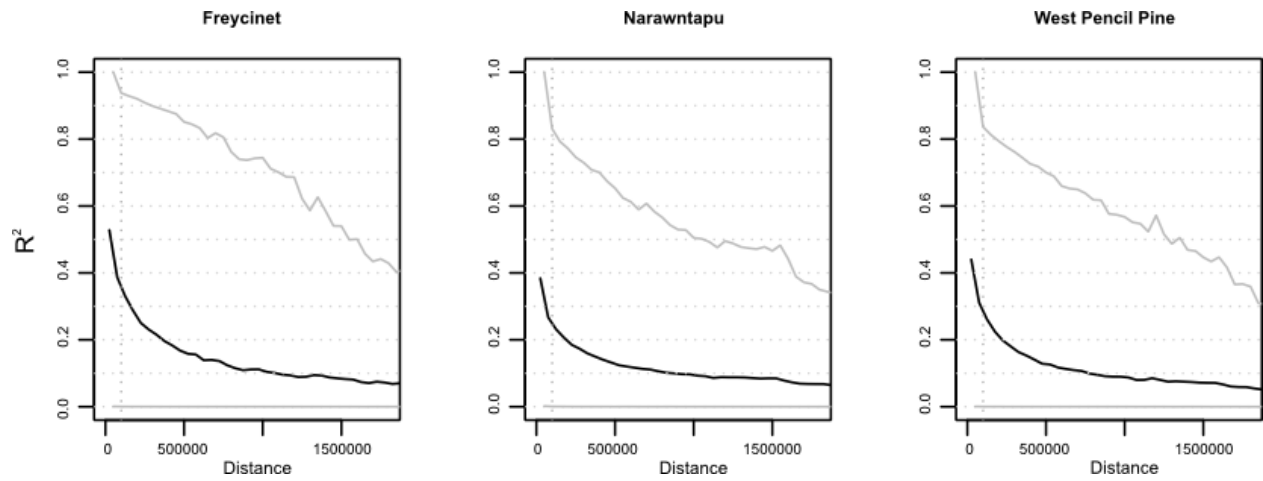

**Supplementary Figure 2. LD Decay**  $R^2$  values (measures of linkage disequilibrium) calculated using Plink for 50 kb bins. The dark black line is the mean  $R^2$  for SNPs separated by a certain distance; the grey lines are the 2.5 and 97.5 percentiles. A dotted vertical line is drawn at 100 kb.

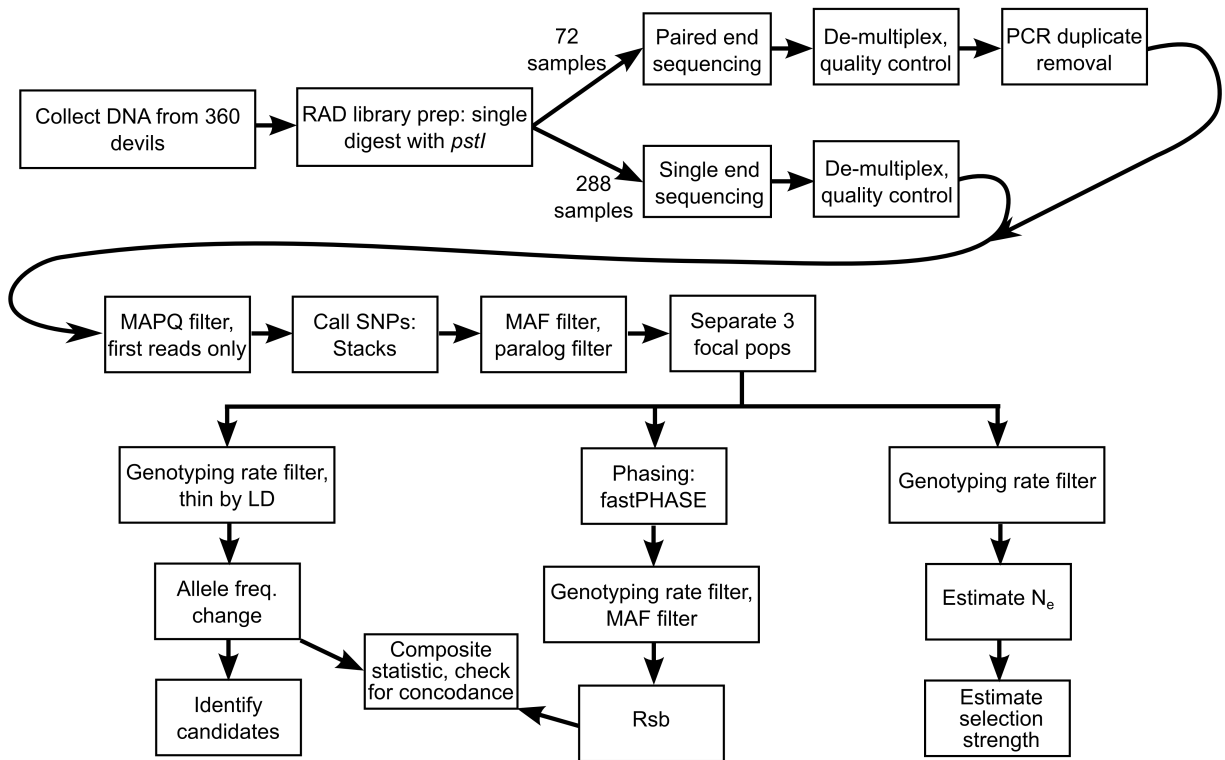

**Supplementary Figure 3. Outline of the major steps in the workflow analyses** See the Methods text for additional detail.

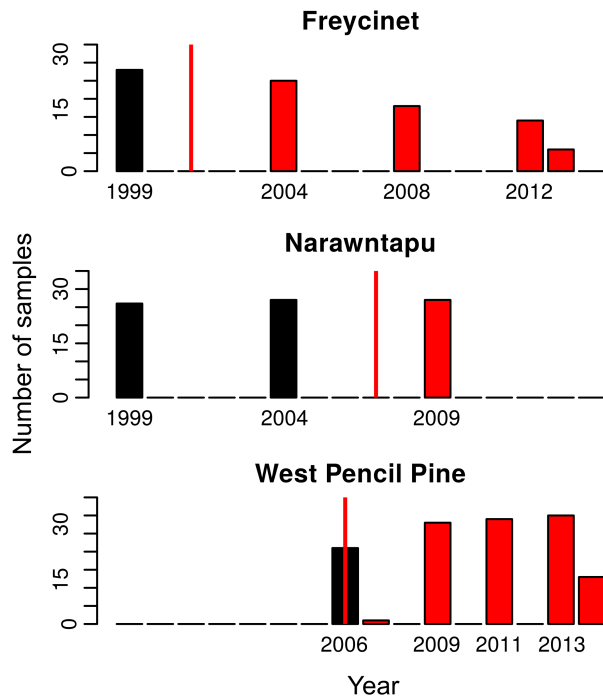

**Supplementary Figure 4. Sample sizes** Number of samples in each of the focal population separated by year of collection. The year in which DFTD was first detected is marked with a red line, years considered to be before DFTD in the analysis are shown in black, and years after DFTD are shown in red.

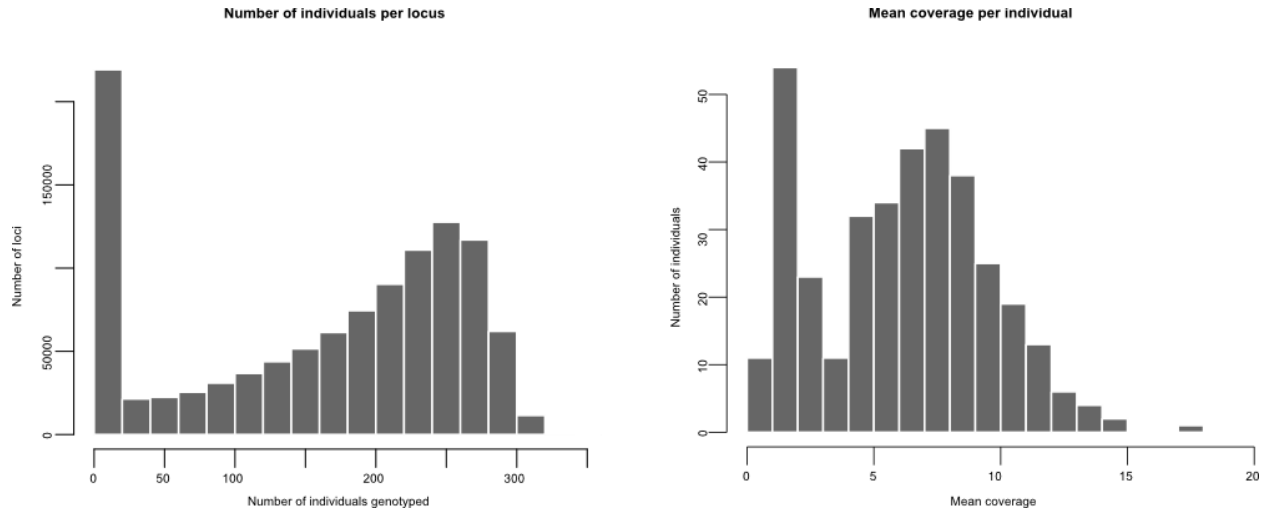

**Supplementary Figure 5. Coverage distributions** Left: Distribution of the number of individuals genotyped for all loci and all 360 individuals. Right: Distribution of mean coverage per individual for loci genotyped in at least one-third of all individuals.

**Supplementary Table 1.** Pearson's correlations coefficients and p-values for allele frequency changes and Rsb values between pairs of populations, and the correlation of allele frequency changes and Rsb within each .

| SNPs          |                | Allele frequency change         |                |        |
|---------------|----------------|---------------------------------|----------------|--------|
| Population 1  | Population 2   | r                               | p              | df     |
| Freycinet     | Narawntapu     | 0.11                            | < <b>0.001</b> | 15,367 |
| Freycinet     | W. Pencil Pine | 0.01                            | 0.55           | 3,223  |
| Narawntapu    | W. Pencil Pine | 0.04                            | <b>0.006</b>   | 4,176  |
| Windows       |                |                                 |                |        |
| Freycinet     | Narawntapu     | 0.15                            | < <b>0.001</b> | 8,223  |
| Freycinet     | W. Pencil Pine | 0.02                            | 0.50           | 806    |
| Narawntapu    | W. Pencil Pine | 0.07                            | <b>0.02</b>    | 971    |
| SNPs          |                | Rsb                             |                |        |
| Freycinet     | Narawntapu     | 0.002                           | 0.81           | 22,027 |
| Freycinet     | W. Pencil Pine | -0.02                           | 0.60           | 986    |
| Narawntapu    | W. Pencil Pine | -0.17                           | < <b>0.001</b> | 1,029  |
| Windows       |                |                                 |                |        |
| Freycinet     | Narawntapu     | 0.01                            | 0.19           | 11,424 |
| Freycinet     | W. Pencil Pine | -0.007                          | 0.87           | 577    |
| Narawntapu    | W. Pencil Pine | -0.22                           | < <b>0.001</b> | 592    |
| SNPs          |                | Allele frequency change and Rsb |                |        |
| Freycinet     |                | 0.02                            | <b>0.03</b>    | 12,862 |
| Narawntapu    |                | -0.004                          | 0.50           | 23,207 |
| W Pencil Pine |                | 0.001                           | 0.98           | 984    |
| Windows       |                |                                 |                |        |
| Freycinet     |                | -0.03                           | <b>0.02</b>    | 7,809  |
| Narawntapu    |                | -0.09                           | < <b>0.001</b> | 12,432 |
| W Pencil Pine |                | 0.03                            | 0.51           | 375    |

**Supplementary Table 2.** SNPs in the two candidate genomic regions that had allele frequency changes at or greater than the 97.5 percentile, and the population in which the large allele frequency changes were detected. For each SNP, we give the absolute magnitude of allele frequency change, as well as the quantile within the population and the start and end frequencies, and we give the point estimate and 95% CI for the fitness advantage conferred by the increasing allele<sup>1</sup>.

| SNP Id     | Scaffold: position        | Population       | Allele frequency change (start – end), quantile | Fitness advantage value (95% confidence interval) |
|------------|---------------------------|------------------|-------------------------------------------------|---------------------------------------------------|
| 369152_134 | chr3_GL849657:<br>278112  | Freycinet        | 0.38 (0.29 – 0.58),<br>0.98                     | 0.25 (-0.07 – 0.57)                               |
| 369163_5   | chr3_GL849657:<br>292515  | Freycinet        | 0.36 (0.14 – 0.5),<br>0.98                      | 0.27 (-0.07 – 0.60)                               |
| 292763_85  | chr2_GL841593:<br>4649090 | Freycinet        | 0.38 (0.42 – 0.04),<br>0.98                     | 0.32 (-0.02 – 0.67)                               |
| 292774_62  | chr2_GL841593:<br>4695526 | Freycinet        | 0.38 (0.46 – 0.08),<br>0.98                     | 0.32 (-0.04 – 0.70)                               |
| 292844_123 | chr2_GL841593:<br>4979736 | Freycinet        | 0.48 (0.63 – 0.15),<br>0.99                     | 0.29 (-0.03 – 0.60)                               |
| 369157_73  | chr3_GL849657:<br>283671  | Narawntapu       | 0.38 (0.42 – 0.80),<br>0.995                    | 1.01 (0.33 – 1.70)                                |
| 800580_43  | chr2_GL841593:<br>4488810 | Narawntapu       | 0.31 (0.58 – 0.27),<br>0.99                     | 0.33 (-0.34 – 0.93)                               |
| 292728_92  | chr2_GL841593:<br>4501785 | Narawntapu       | 0.43 (0.61 – 0.18),<br>0.998                    | 0.79 (0.11 – 1.43)                                |
| 800585_43  | chr2_GL841593:<br>4553946 | Narawntapu       | 0.39 (0.47 – 0.09),<br>0.996                    | 0.83 (-0.17 – 1.56)                               |
| 369157_43  | chr3_GL849657:<br>283701  | West Pencil Pine | 0.39 (0.05 – 0.43),<br>0.99                     | 0.43 (-0.06 – 0.94)                               |
| 369157_73  | chr3_GL849657:<br>283671  | West Pencil Pine | 0.39 (0.05 – 0.43),<br>0.99                     | 0.44 (-0.06 – 0.96)                               |
| 800585_43  | chr2_GL841593:<br>4553946 | West Pencil Pine | 0.33 (0.55 – 0.22),<br>0.98                     | 0.44 (-0.07 – 0.93)                               |

## Supplementary References

1. Mathieson, I. & McVean, G. Estimating selection coefficients in spatially structured populations from time series data of allele frequencies. *Genetics* **193**, 973–984 (2013).
